# Supplementary material for: A Comparative Study on Phytochemical Fingerprint of Two Diverse Phaseolus vulgarisvar. Tondino del Tavo and Cannellino Bio Extracts
Source: MDPI journal article supplement (doi:10.3390/antiox11081474), 2022-07-28
Supplement: s1 [file s1]

## SUPPORTING INFO

### **A comparative study on phytochemical fingerprint of two di-verse *Phaseolus vulgaris* var. Tondino del Tavo and Cannellino Bio extracts**

Azzurra Stefanucci<sup>1,\*</sup>, Giuseppe Scioi<sup>1</sup>, Lorenza Marinaccio<sup>1</sup>, Gokhan Zengin<sup>2</sup>, Marcello Locatelli<sup>1</sup>, Angela Tartaglia<sup>1</sup>, Alice Della Valle<sup>1</sup>, Angelo Cichelli<sup>3</sup>, Ettore Novellino<sup>4,5</sup>, Stefano Pieretti<sup>6</sup>, Adriano Mollica<sup>1</sup>

<sup>1</sup>Department of Pharmacy, University of Chieti–Pescara “G. d’Annunzio”, Via dei Vestini 31, Chieti 66100, Italy; a.stefanucci@unich.it; giuseppe.scioi@unich.it; lorenza.marinaccio@unich.it; marcello.locatelli@unich.it; angela.tartaglia@unich.it; alice.dellavalle@unich.it; adriano.mollica@unich.it

<sup>2</sup>Selcuk University, Science Faculty, Department of Biology, Campus, 42250 Konya, Turkey; gokhan-zengin@selcuk.edu.tr

<sup>3</sup>Department of Innovative Technologies in Medicine and Dentistry, University of Chieti–Pescara “G. d’Annunzio”, Via dei Vestini 31, Chieti 66100, Italy; angelo.cichelli@unich.it

<sup>4</sup>Department of Medicine and Surgery, Università Cattolica del Sacro Cuore, 00168 Rome, Italy; ettore.novellino@unicatt.it

<sup>5</sup>NGN Healthcare-New Generation Nutraceuticals s.r.l., Torrette Via Nazionale 207, 83013 Mercogliano, Italy;

<sup>6</sup>National Centre for Drug Research and Evaluation, Istituto Superiore di Sanità, 00161 Rome, Italy; stefano.pieretti@iss.it

\*Correspondence: a.stefanucci@unich.it

## Tondino del Tavo 4TT Extract

|           |           |                 |                |                |
|-----------|-----------|-----------------|----------------|----------------|
| p-OH benz | 3 OH benz | p-coumaric acid | Sinapinic acid | t-ferulic acid |
| 256       | 295       | 309             | 324            | 315            |

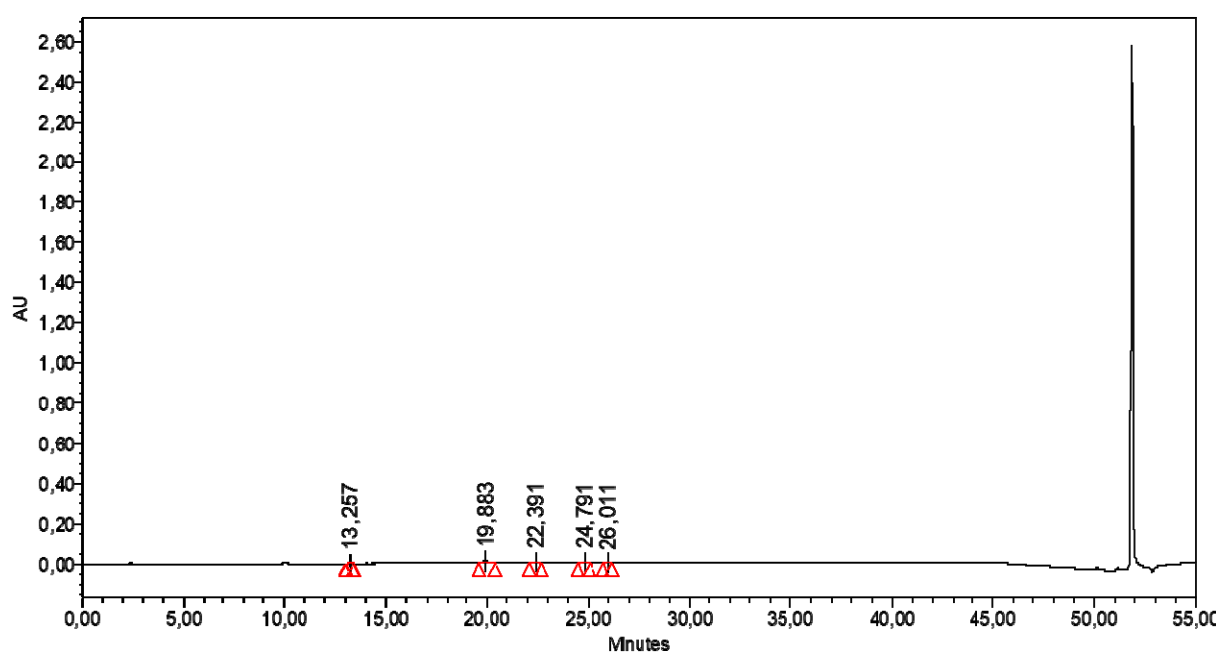

**Cannellino Bio  
4CB extract**

|           |           |                 |                |                |
|-----------|-----------|-----------------|----------------|----------------|
| p-OH benz | 3 OH benz | p-coumaric acid | Sinapinic acid | t-ferulic acid |
| 256       | 295       | 309             | 324            | 315            |

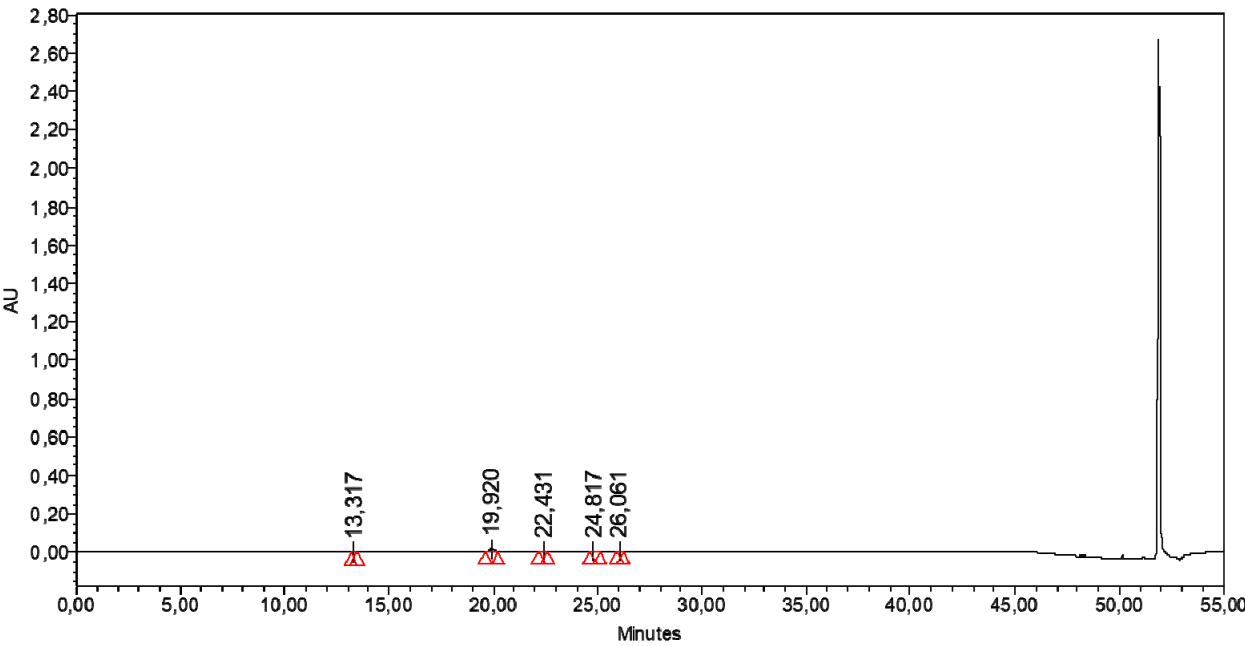

**HPLC traces of Cannellino Bio 4TT and 4CB extracts**
